# Supplementary material for: Convalescent Adaptive Immunity Is Highly Heterogenous after SARS-CoV-2 Infection
Source: MDPI journal article supplement (doi:10.3390/jcm12227136), 2023-11-16
Supplement: s1 [file s1]

**Supplementary Table S1. Diagnostic potential of S1 and S2 specific CD4 and CD8 T cell subsets in discrimination Convalescent patients and unexposed donors.**

| T cell Subset            | Sensitivity           | Specificity            | AUC        | Cut-off | P value     |
|--------------------------|-----------------------|------------------------|------------|---------|-------------|
| CD4+ PDL1+CD25+ (S1-nil) | 60 (42.3 - 75.4)      | 85.7 (CI 48.6 - 99.27) | 0.707<br>1 | 0.3     | 0.0916      |
| CD4+ PDL1+CD25+ (S2-nil) | 53.3 (CI 36.1 - 69.7) | 85.7 (CI 48.6 - 99.27) | 0.740<br>5 | 0.11    | <b>0.05</b> |
| CD4+ CD134+CD25+(S1-nil) | 46.6 (CI 30.2 - 63.8) | 100 (CI 64.5 - 100)    | 0.721<br>4 | 0.76    | 0.0714      |
| CD4+ CD134+CD25+(S2-nil) | 56.6 (CI 39.2 - 72.6) | 85.7 (CI 48.6 - 99.27) | 0.688<br>1 | 0.06    | 0.125       |
| CD4+ PDL1+CD11a+(S1-nil) | 66.6 (CI 48.7 - 80.7) | 71.4 (CI 35.8 - 94.9)  | 0.633<br>3 | 0.255   | 0.2776      |
| CD4+ PDL1+CD11a+(S2-nil) | 80 (CI 62.6 - 90.4)   | 57.1 (CI 25.0 - 84.1)  | 0.666<br>7 | 0.015   | 0.1747      |
| CD8+ PDL1+CD25+ (S1-nil) | 16.6 (CI 7.3 -33.5)   | 100 (CI 64.5 - 100)    | 0.6        | 0.07    | 0.415       |
| CD8+ PDL1+CD25+ (S2-nil) | 16.6 (CI 7.3 -33.5)   | 100 (CI 64.5 - 100)    | 0.523<br>8 | 0.14    | 0.842       |
| CD8+ CD134+CD25+(S1-nil) | 70 (CI 52.1 - 83.3)   | 4208 (CI 15.8 - 74.9)  | 0.547<br>6 | 0.01    | 0.6982      |
| CD8+ CD134+CD25+(S2-nil) | 46.6 (CI 30.2 - 63.8) | 71.4 (CI 35.8 - 94.9)  | 0.6        | 0.015   | 0.415       |
| CD8+ PDL1+CD11a+(S1-nil) | 53.3 (CI 36.1 - 69.7) | 71.4 (CI 35.8 - 94.9)  | 0.602<br>4 | 0.86    | 0.404       |
| CD8+ PDL1+CD11a+(S2-nil) | 80 (CI 62.9 - 90.4)   | 57.14 (CI 25.0 - 84.1) | 0.623<br>8 | 0.015   | 0.313       |

### Supplementary Figure S1:

### CD4 subsets, ELISpot and % of Lysis

|       | Stimulation | CDB6+<br>OX40+ | CDB9+<br>PDL1+ | CDB9+<br>CD25+ | CDB9+<br>AIBB+ | OX40+<br>PDL1+ | CD25+<br>PDL1+ | CD25+<br>OX40+ | AIBB+<br>OX40+ | CD40L+<br>AIBB+ | OX40+<br>CD40+ | HLADR+<br>CD38+ | ELISpot | % Lysis |      | CDB6+<br>OX40+ | CDB9+<br>PDL1+ | CDB9+<br>CD25+ | CDB9+<br>AIBB+ | OX40+<br>PDL1+ | CD25+<br>PDL1+ | CD25+<br>OX40+ | AIBB+<br>OX40+ | CD40L+<br>AIBB+ | OX40+<br>CD40+ | HLADR+<br>CD38+ | ELISpot | % Lysis |      |       |  |
|-------|-------------|----------------|----------------|----------------|----------------|----------------|----------------|----------------|----------------|-----------------|----------------|-----------------|---------|---------|------|----------------|----------------|----------------|----------------|----------------|----------------|----------------|----------------|-----------------|----------------|-----------------|---------|---------|------|-------|--|
| Pt-1  | Cov1        | 0              | 0              | 0              | -0.01          | -0.01          | -0.01          | 0              | 0.01           | 0.05            | 0.03           |                 | 73.3    | 20.2    |      | -0.08          | -0.01          | -0.02          | -0.03          | 0              | 0              | 0              | -0.01          | -0.02           | 0.04           | 0.07            | 30.3    | 41.9    |      | Pt-16 |  |
|       | Cov3        | -0.21          | 0              | -0.04          | -0.01          | -0.02          | 0              | 0.01           | 0.01           | 0               | 0.03           |                 | 77.0    | 28.8    |      | -0.09          | 0.01           | 0.01           | -0.05          | 0.01           | 0.02           | 0.01           | 0              | -0.03           | -0.04          | -0.06           | 7.7     | 22.9    |      |       |  |
|       | Cov132      | 0              | -0.01          | -0.02          | -0.01          | 0              | 0.02           | -0.04          | -0.01          | -0.01           | 0.05           |                 | 38.0    | 22.7    |      | -0.09          | -0.01          | -0.02          | -0.04          | 0              | 0.01           | 0              | -0.01          | -0.02           | 0.01           | -0.06           | 6.3     | 18.3    |      |       |  |
|       | Cov267      | 0              | 0              | -0.01          | 0              | -0.03          | 0              | 0              | -0.01          | 0.01            | 0.02           |                 | 16.7    | 24.5    |      | -0.09          | 0.01           | 0              | -0.05          | 0              | 0.01           | 0              | -0.01          | -0.02           | 0              | -0.1            | 16.0    | 22.6    |      |       |  |
|       | Cov268      | 0              | 0              | -0.02          | -0.01          | -0.03          | 0              | -0.01          | -0.03          | 0               | 0              |                 | 31.3    | 18.7    |      | -0.07          | 0              | -0.01          | -0.04          | 0.01           | 0.04           | 0.01           | -0.01          | -0.04           | 0.01           | 0.09            | 3.0     | 25.4    |      |       |  |
|       | Cov385      | 0.02           | 0.02           | 0.02           | 0              | -0.02          | 0.01           | -0.03          | 0              | 0               | 0.04           |                 | 16.3    | 4.1     |      | -0.05          | 0              | -0.01          | -0.06          | 0.01           | 0.04           | 0.01           | -0.02          | -0.03           | 0              | 0.22            | 5.0     | 17.5    |      |       |  |
|       | Cov416      | 0              | 0              | 0              | 0.01           | -0.02          | 0.02           | 0.01           | -0.01          | 0               | 0.02           |                 | 34.7    | 6.4     |      | -0.1           | 0              | -0.01          | -0.04          | 0              | 0.02           | 0              | -0.02          | -0.04           | 0.01           | 0               | 4.0     | 18.0    |      |       |  |
|       | Cov514      | -0.31          | 0              | -0.02          | -0.02          | -0.02          | 0              | -0.01          | 0.01           | 0               | 0.01           |                 | 34.7    | 8.9     |      | -0.09          | 0              | 0.02           | -0.04          | 0              | 0.01           | 0              | -0.02          | -0.03           | 0.03           | 0.63            | 2.7     | 10.4    |      |       |  |
|       | Cov690      | 0              | 0              | -0.01          | 0.02           | 0              | 0              | -0.01          | -0.02          | 0               | 0.01           |                 | 56.0    | 15.2    |      | -0.08          | 0.01           | 0.02           | -0.04          | 0              | 0.01           | 0.02           | -0.02          | -0.04           | 0.01           | -0.01           | 24.3    | 13.6    |      |       |  |
| IT    | 0.11        | 0.13           | 0.17           | 0.15           | 0.18           | 0.08           | 0              | 0.11           | 0.01           | 0.07            |                |                 | 99.3    |         |      | 0.17           | 0.57           | 0.43           | 0.24           | 0.54           | 0.13           | 0              | 0.33           | 0.04            | -0.01          | 0.06            | 263.3   |         |      |       |  |
| Pt-2  | Cov1        | -0.08          | -0.08          | -0.09          | -0.11          | 0.01           | 0.03           | 0.04           | 0.05           | 0.08            | -0.01          |                 | 49.0    | 5.9     |      | 0              | 0.03           | -0.05          | 0.01           | 0.01           | -0.01          | 0.01           | 0.01           | 0               | -0.01          | 0.07            | 63.7    | 46.8    |      | Pt-17 |  |
|       | Cov3        | 0.06           | -0.03          | -0.43          | -1.84          | 0.03           | 0.04           | 0.1            | 0.05           | 0.04            | 0.08           |                 | -1.0    | 7.1     |      | -0.01          | 0.04           | 0.01           | 0.01           | 0.02           | -0.01          | 0              | 0.02           | 0.01            | -0.04          | 0.27            | 24.3    | 20.9    |      |       |  |
|       | Cov132      | 0.49           | 0.75           | 0.37           | 1.57           | 0.3            | 0.07           | 0.06           | 0.21           | 0.08            | 0.04           |                 | 2.0     | 4.6     |      | -0.04          | 0.02           | -0.1           | -0.02          | 0.04           | -0.01          | -0.03          | -0.01          | 0.01            | -0.06          | 0.04            | 11.3    | 16.0    |      |       |  |
|       | Cov267      | -0.468         | 1.07           | 1.01           | 3.1            | 0.45           | 0.06           | 0.06           | 0.29           | 0.08            | 0.09           |                 | 1.3     | 2.2     |      | -0.04          | 0.02           | -0.03          | -0.02          | 0              | -0.01          | -0.02          | 0              | 0.03            | -0.05          | -0.01           | 1.0     | 29.3    |      |       |  |
|       | Cov268      | 0.2            | 0.1            | 0.37           | 1.18           | 0.08           | 0.01           | 0.02           | 0.04           | 0.02            | 0.04           |                 | 2.0     | 0.4     |      | -0.01          | 0.03           | 0.06           | 0.02           | 0.06           | -0.01          | 0.06           | 0.01           | 0.08            | 0.08           | 0.27            | 11.0    | 24.6    |      |       |  |
|       | Cov385      | 0.67           | 0.7            | 2              | 5.14           | 0.3            | 0.05           | 0.05           | 0.2            | 0.05            | 0.05           |                 | 7.7     | 7.8     |      | -0.01          | 0.07           | 0.03           | 0.01           | 0.05           | 0.03           | -0.04          | 0.04           | 0.01            | -0.01          | 0.18            | 3.0     | 8.6     |      |       |  |
|       | Cov416      | 1.53           | 0.76           | 0.94           | 1.45           | 0.77           | 0.04           | 0.12           | 0.66           | 0.08            | 0.13           |                 | 6.7     | 1.8     |      | -0.02          | -0.01          | -0.01          | 0.03           | -0.02          | 0              | -0.02          | 0.04           | 0.01            | -0.04          | 0.17            | 6.3     | 8.6     |      |       |  |
|       | Cov514      | 2.08           | 1.03           | 3.09           | 5.72           | 0.88           | 0.13           | 0.17           | 0.82           | 0.14            | 0.16           |                 | 0.3     | 3.9     |      | -0.03          | -0.01          | 0              | -0.02          | 0.05           | 0              | 0.05           | 0              | 0               | 0.03           | 0.1             | 20.0    | 1.7     |      |       |  |
|       | Cov690      | 0.92           | 0.02           | 0.18           | 0.84           | 0.28           | 0.02           | 0.06           | 0.34           | 0.03            | 0.07           |                 | 107.7   | 8.8     |      | -0.04          | 0.03           | 0.03           | 0.01           | 0.02           | 0.01           | 0.03           | 0.01           | 0.03            | 0.02           | 0.18            | 31.3    | 49.1    |      |       |  |
| IT    | 4.72        | 5.31           | 6.12           | 11.45          | 3.11           | 0.16           | 0.11           | 1.71           | 0.19           | 0.22            |                |                 | 246.3   |         |      | 0.21           | 0.94           | 0.44           | 0.1            | 0.89           | 0.11           | 0              | -0.01          | 0.08            | 0.02           | 0.58            | 76.0    |         |      |       |  |
| Pt-3  | Cov1        | 0.02           | 0.03           | 0.29           | 0.14           | 0              | -0.01          | 0.01           | 0.04           | 0               | -0.04          | -0.02           | 38.7    | 36.4    |      | 0.04           | -0.01          | 0.02           | 0.04           | -0.01          | -0.01          | 0.01           | 0.03           | 0.05            | 0.06           | 0.09            | 22.7    | 18.5    |      | Pt-20 |  |
|       | Cov3        | 0              | 0.05           | 0.22           | 0.08           | 0.09           | 0.02           | -0.01          | -0.01          | 0.01            | -0.01          | 0.19            | 87.7    | 28.9    |      | 0.04           | -0.02          | 0.02           | 0.04           | 0.01           | 0              | 0              | 0.03           | 0.01            | 0.03           | 0.17            | 7.3     | 15.8    |      |       |  |
|       | Cov132      | 0.04           | 0.02           | 0.2            | 0.07           | 0.09           | 0              | 0.01           | 0.02           | 0               | -0.01          | 0.13            | 33.7    | 24.2    |      | 0.03           | -0.04          | 0.01           | 0.05           | -0.02          | -0.01          | 0              | 0.07           | 0.07            | 0.06           | 0.06            | 11.7    | 7.3     | 19.8 |       |  |
|       | Cov267      | -0.02          | -0.01          | 0.17           | 0.19           | 0              | -0.02          | -0.01          | 0.04           | 0               | 0.01           | 0.13            | 54.3    | 19.1    |      | 0              | -0.08          | -0.03          | 0.01           | -0.03          | -0.01          | 0              | 0.02           | -0.01           | -0.01          | -0.01           | 2.0     | 16.1    |      |       |  |
|       | Cov268      | 0.03           | -0.07          | 0.37           | 0.23           | 0.08           | 0.03           | 0.01           | 0.04           | -0.01           | -0.01          | 0.07            | 54.7    | 14.7    |      | 0.08           | -0.03          | 0.13           | 0.12           | 0.07           | -0.01          | 0              | 0.07           | 0.12            | 0.06           | 0.2             | 9.7     | 15.2    |      |       |  |
|       | Cov385      | -0.01          | 0.12           | 0.27           | 0.06           | 0.04           | 0.07           | 0.01           | -0.04          | -0.04           | -0.07          | 0.22            | 3.7     | 14.0    |      | 0.08           | 0.06           | 0.07           | 0.07           | 0.04           | 0.01           | 0.01           | 0.08           | 0.15            | 0.06           | 0.15            | 1.3     | 1.5     |      |       |  |
|       | Cov416      | 0.05           | 0.02           | 0.24           | 0.05           | 0.09           | 0.07           | 0              | 0.06           | 0               | -0.05          | 0.12            | -0.3    | 21.4    |      | 0.04           | 0.04           | 0.08           | 0.08           | 0.03           | -0.01          | 0              | 0.06           | 0.09            | 0.03           | 0.22            | 2.7     | 9.2     |      |       |  |
|       | Cov514      | 0.06           | 0.14           | 0.79           | 0.51           | 0.06           | 0.08           | 0.01           | -0.06          | -0.02           | 0.05           | 0.47            | 3.9     | 17.3    |      | 0.1            | 0.08           | 0.19           | 0.13           | 0.04           | 0.01           | -0.01          | 0.09           | 0.13            | 0.09           | 0.23            | 21.7    | 8.9     |      |       |  |
|       | Cov690      | 0.04           | 0.03           | 0.34           | 0.07           | 0.07           | -0.02          | 0.01           | -0.03          | -0.01           | 0.01           | 0.21            | 7.7     | 28.1    |      | 0.04           | -0.03          | 0.04           | 0.77           | 0              | -0.01          | 0              | 0.09           | 0.13            | 0.09           | 0.17            | 21.7    | 12.2    |      |       |  |
| IT    | 0.6         | 0.63           | 0.97           | 0.39           | 0.86           | 0.01           | 0.01           | 0.25           | 0.11           | 0.32            | 0.15           | 161.3           |         |         | 0.05 | 0.19           | 0.14           | 0.16           | 0.13           | 0.01           | 0              | 0.08           | 0.18           | 0.02            | 0.1            | 195.0           |         |         |      |       |  |
| Pt-6  | Cov1        | -0.02          | -0.02          | 0              | 0.04           | -0.02          | 0              | -0.02          | -0.04          | 0               | 0.02           | -0.07           | 4.4     | 2.9     |      | -0.02          | -0.03          | -0.04          | 0.01           | -0.04          | 0.01           | -0.06          | -0.03          | 0.01            | -0.11          | -0.01           | 46.0    | 29.8    |      | Pt-23 |  |
|       | Cov3        | -0.01          | -0.01          | -0.08          | -0.02          | -0.01          | -0.01          | -0.03          | -0.06          | -0.03           | -0.01          | -0.29           | 5.7     | 18.0    |      | -0.05          | -0.05          | -0.01          | -0.02          | -0.06          | 0              | 0.05           | -0.01          | -0.05           | -0.16          | -0.03           | 69.7    | 25.8    |      |       |  |
|       | Cov132      | -0.01          | 0              | -0.04          | -0.01          | -0.01          | 0.01           | -0.02          | 0.01           | -0.01           | -0.05          | -0.35           | 4.4     | 18.1    |      | -0.05          | -0.03          | -0.02          | -0.01          | 0.04           | 0              | 0.02           | -0.04          | -0.05           | -0.17          | -0.11           | 55.3    | 17.9    |      |       |  |
|       | Cov267      | -0.01          | 0.01           | 0.16           | 0.03           | 0              | -0.02          | -0.02          | -0.02          | -0.01           | -0.02          | -0.46           | 43.4    | 22.1    |      | -0.01          | -0.01          | -0.03          | -0.01          | 0.07           | 0.01           | -0.02          | -0.03          | -0.06           | -0.15          | -0.12           | 49.3    | 28.7    |      |       |  |
|       | Cov268      | -0.01          | 0.02           | -0.04          | 0.03           | 0              | -0.01          | -0.01          | -0.04          | -0.01           | -0.02          | -0.24           | 77.0    | 13.4    |      | -0.07          | -0.01          | -0.03          | 0              | -0.06          | 0.02           | -0.06          | -0.03          | -0.03           | -0.12          | -0.14           | 24.0    | 12.1    |      |       |  |
|       | Cov385      | -0.01          | -0.01          | -0.03          | 0.04           | -0.01          | 0.01           | 0.01           | -0.04          | -0.03           | -0.02          | 0.24            | 23.7    | 13.2    |      | 0.26           | 0.02           | 0.01           | 0.04           | -0.01          | 0.03           | -0.07          | 0.06           | 0.37            | 0.03           | -0.17           | 34.7    | 5.5     |      |       |  |
|       | Cov416      | 0              | 0.01           | -0.02          | -0.02          | 0.03           | 0.01           | 0.02           | -0.01          | -0.01           | -0.01          | -0.24           | 59.4    | 12.3    |      | -0.28          | -0.03          | 0.04           | 0.02           | -0.06          | 0.01           | -0.09          | -0.03          | 0               | -0.11          | -0.15           | 28.7    | 4.2     |      |       |  |
|       | Cov514      | 0.03           | 0.02           | 0.28           | 0.02           | 0.03           | 0.01           | -0.01          | 0.04           | 0               | 0              | -0.27           | 117.7   | 9.9     |      | 0.14           | 0.24           | 0.07           | 0.02           | 0.06           | 0.03           | -0.04          | 0.01           | 0.25            | -0.07          | 14.3            | 17.4    |         |      |       |  |
|       | Cov690      | 0              | 0.11           | 0.02           | -0.02          | 0.02           | -0.03          | 0              | -0.01          | -0.01           | -0.01          | -0.36           | 3.7     | 27.8    |      | 0              | -0.02          | -0.04          | -0.01          | -0.04          | 0              | 0.05           | 0.04           | 0.02            | -0.08          | -0.06           | 35.0    | 19.8    |      |       |  |
| IT    | 0.08        | 0.38           | 0.16           | 0.2            | 0.17           | 0.05           | -0.03          | 0.12           | 0.07           | 0.05            | -0.11          | 424.4           |         |         | 0.06 | -0.02          | 0.07           | 0.09           | -0.04          | -0.01          | -0.08          | 0.19           | 0.19           | -0.09           | -0.22          | 87.3            |         |         |      |       |  |
| Pt-12 | Cov1        | 0.02           | -0.01          | 0.03           | 0.09           | 0              | -0.02          | 0.03           | 0.01           | 0.02            | 0              | 0.08            | 38.7    | 37.9    |      | 0              | 0.13           | -0.02          | 0.01           | 0.23           | 0.11           | 0.13           | -0.01          | -0.04           | -0.01          | 0.08            | 75.7    | 21.1    |      | Pt-25 |  |
|       | Cov3        | 0              | -0.01          | 0.01           | 0.08           | 0.01           | -0.01          | 0.43           | 0.05           | -0.01           | -0.01          | 0.12            | 6.4     | 23.0    |      | 0.01           | 0.01           | -0.09          | 0.02           | 0.09           | 0.07           | 0.07           | 0.04           | 0               | 0              | 0.17            | 16.0    | 24.1    |      |       |  |
|       | Cov132      | 0.01           | 0              | 0.01           | 0.03           | 0.01           | 0.01           | 0.19           | 0.01           | 0.01            | -0.02          | 0.06            | 55.7    | 21.8    |      | -0.02          | -0.01          | -0.13          | 0.02           | 0.07           | 0.04           | 0.06           | 0.05           | -0.02           | -0.02          | 0.13            | 25.3    | 26.7    |      |       |  |
|       | Cov267      | 0.01           | -0.01          | 0.01           | 0.03           | 0              | -0.01          | 0.14           | 0.03           | 0.01            | -0.02          | 0.01            | 38.4    | 31.1    |      | -0.01          | 0.01           | -0.01          | -0.04          | 0.07           | 0.04           | 0.02           | -0.03          | 0               | -0.02          | 0.11            | 34.0    | 38.1    |      |       |  |
|       | Cov268      | -0.02          | -0.01          | 0              | 0.03           | 0.01           | 0.01           | 0.16           | 0.02           | 0.01            | -0.03          | 0.1             | 11.0    | 33.4    |      | -0.01          | 0              | -0.17          | -0.01          | 0.6            | 0.02           | 0.03           | -0.06          | -0.03           | -0.02          | 0.05            | 44.3    | 15.9    |      |       |  |
|       | Cov385      | 0              | -0.01          | 0.02           | 0.07           | -0.01          | 0              | 0.28           | 0.06           | 0               | -0.02          | 0.08            | 24      | 22.0    |      | -0.01          | 0.02           | -0.13          | 0.02           | 0.24           | 0.06           | 0.08           | -0.02          | -0.02           | -0.01          | 0.17            | 13.3    | 8.6     |      |       |  |
|       | Cov416      | 0.01           | -0.01          | 0.03           | 0.05           | 0.01           | 0              | 0.3            | 0.04           | 0.01            | -0.03          | 0.06            | 1.7     | 27.0    |      | 0              | 0.02           | -0.17          | -0.02          | 0.32           | 0.04           | 0.02           | -0.04          | -0.03           | -0.01          | 0.09            | 9.3     | 14.4    |      |       |  |
|       | Cov514      | 0.02           | 0              | 0.06           | 0.09           | 0.02           | 0              | 0.2            | 0.03           | 0.02            | -0.01          | 0.02            | 14.4    | 1.2     |      | 0.03           | 0.1            | -0.06          | 0.03           | 0.13           | 0.08           | 0.07           | -0.05          | -0.03           | -0.01          | 0.06            | 17.7    | 4.8     |      |       |  |
|       | Cov690      | 0.01           | 0.01           | 0.04           | 0.08           | 0.01           | 0.02           | 0.3            | 0.03           | 0.01            | -0.02          | 0.05            | 19.4    | 28.7    |      | 0.01           | 0.02           | -0.02          | 0.03           | 0.07           | 0.09           | 0.05           | 0.04           | -0.02           | 0.01           | 0.18            | 55.3    | 16.7    |      |       |  |
| IT    |             |                |                |                |                |                |                |                |                |                 |                |                 |         |         |      |                |                |                |                |                |                |                |                |                 |                |                 |         |         |      |       |  |

## CD8 subsets, ELISpot and % of Lysis

|        | Stimulation | CD8 <sup>+</sup><br>OX40 <sup>+</sup> | CD8 <sup>+</sup><br>POL1 <sup>+</sup> | CD8 <sup>+</sup><br>CD25 <sup>+</sup> | CD8 <sup>+</sup><br>41BB <sup>+</sup> | OX40 <sup>+</sup><br>POL1 <sup>+</sup> | CD25 <sup>+</sup><br>POL1 <sup>+</sup> | CD25 <sup>+</sup><br>OX40 <sup>+</sup> | 41BB <sup>+</sup><br>OX40 <sup>+</sup> | CD40 <sup>+</sup><br>41BB <sup>+</sup> | OX40 <sup>+</sup><br>CD40 <sup>+</sup> | HLADR <sup>+</sup><br>CD38 <sup>+</sup> | ELISpot | % Lysis |       | CD8 <sup>+</sup><br>OX40 <sup>+</sup> | CD8 <sup>+</sup><br>POL1 <sup>+</sup> | CD8 <sup>+</sup><br>CD25 <sup>+</sup> | CD8 <sup>+</sup><br>41BB <sup>+</sup> | OX40 <sup>+</sup><br>POL1 <sup>+</sup> | CD25 <sup>+</sup><br>POL1 <sup>+</sup> | CD25 <sup>+</sup><br>OX40 <sup>+</sup> | 41BB <sup>+</sup><br>OX40 <sup>+</sup> | CD40 <sup>+</sup><br>41BB <sup>+</sup> | OX40 <sup>+</sup><br>CD40 <sup>+</sup> | HLADR <sup>+</sup><br>CD38 <sup>+</sup> | ELISpot | % Lysis |      |  |
|--------|-------------|---------------------------------------|---------------------------------------|---------------------------------------|---------------------------------------|----------------------------------------|----------------------------------------|----------------------------------------|----------------------------------------|----------------------------------------|----------------------------------------|-----------------------------------------|---------|---------|-------|---------------------------------------|---------------------------------------|---------------------------------------|---------------------------------------|----------------------------------------|----------------------------------------|----------------------------------------|----------------------------------------|----------------------------------------|----------------------------------------|-----------------------------------------|---------|---------|------|--|
| Pt-1   | Con1        | 0.01                                  | -0.01                                 | -0.07                                 | -0.1                                  | -0.06                                  | -0.17                                  | -0.1                                   | 0.08                                   | -0.05                                  | 0.01                                   |                                         | 73.3    | 20.2    |       | -0.03                                 | -0.06                                 | -0.68                                 | -0.42                                 | -0.02                                  | 0                                      | 0                                      | -0.15                                  | 0.04                                   | -0.03                                  | 0.39                                    | 30.3    | 41.9    |      |  |
|        | Con2        | -0.03                                 | 0.02                                  | -0.03                                 | -0.14                                 | -0.01                                  | -0.13                                  | -0.01                                  | 0                                      | -0.03                                  | -0.02                                  |                                         | 77.0    | 29.8    |       | -0.05                                 | -0.02                                 | -0.53                                 | -0.31                                 | 0.02                                   | 0                                      | 0                                      | -0.08                                  | 0.02                                   | 0.1                                    | 0.37                                    | 7.7     | 22.9    |      |  |
|        | Con132      | 0.2                                   | -0.01                                 | -0.05                                 | 0.33                                  | -0.02                                  | -0.12                                  | -0.12                                  | 0.28                                   | -0.17                                  | 0.02                                   |                                         | 38.0    | 22.7    |       | -0.03                                 | -0.06                                 | -0.52                                 | -0.48                                 | -0.02                                  | -0.02                                  | 0.02                                   | -0.15                                  | -0.04                                  | 0                                      | 0.25                                    | 6.3     | 18.3    |      |  |
|        | Con267      | 0                                     | 0.01                                  | 0.12                                  | -0.04                                 | -0.03                                  | 0.03                                   | -0.06                                  | 0.02                                   | -0.05                                  | -0.01                                  |                                         | 19.7    | 24.5    |       | -0.04                                 | 0.04                                  | -0.62                                 | -0.45                                 | -0.02                                  | 0.01                                   | 0.01                                   | -0.17                                  | -0.01                                  | 0.08                                   | -0.04                                   | 16.0    | 22.6    |      |  |
|        | Con268      | -0.02                                 | 0.03                                  | -0.05                                 | -0.15                                 | -0.06                                  | -0.12                                  | -0.04                                  | -0.02                                  | -0.13                                  | -0.02                                  |                                         | 31.3    | 18.7    |       | -0.07                                 | 0                                     | -0.55                                 | -0.39                                 | -0.02                                  | -0.02                                  | 0.01                                   | -0.14                                  | 0.01                                   | -0.06                                  | 0.61                                    | 3.0     | 25.4    |      |  |
|        | Con385      | -0.02                                 | 0.02                                  | 0.03                                  | -0.1                                  | -0.05                                  | -0.11                                  | -0.06                                  | 0.04                                   | -0.03                                  | -0.04                                  |                                         | 16.3    | 4.1     |       | -0.05                                 | 0                                     | -0.47                                 | -0.4                                  | -0.02                                  | 0                                      | -0.02                                  | -0.15                                  | 0                                      | -0.03                                  | 0.71                                    | 5.0     | 17.5    |      |  |
|        | Con416      | -0.01                                 | 0.02                                  | 0                                     | -0.03                                 | 0.01                                   | 0.25                                   | -0.02                                  | 0.01                                   | -0.03                                  | 0.01                                   |                                         | 34.7    | 6.4     |       | -0.04                                 | 0.08                                  | -0.55                                 | -0.38                                 | -0.02                                  | -0.02                                  | 0.01                                   | -0.11                                  | -0.04                                  | -0.06                                  | 0.43                                    | 4.0     | 18.0    |      |  |
|        | Con514      | -0.03                                 | -0.01                                 | -0.1                                  | -0.2                                  | -0.07                                  | 0.04                                   | -0.11                                  | -0.04                                  | -0.08                                  | -0.04                                  |                                         | 34.7    | 8.9     |       | -0.05                                 | -0.08                                 | -0.58                                 | -0.45                                 | -0.02                                  | -0.02                                  | 0.02                                   | -0.17                                  | 0.02                                   | -0.03                                  | 0.21                                    | 2.7     | 10.4    |      |  |
| Con690 | 0           | 0.01                                  | -0.04                                 | -0.13                                 | -0.04                                 | 0.02                                   | -0.04                                  | 0.02                                   | -0.11                                  | -0.03                                  |                                        | 56.0                                    | 15.2    |         | -0.07 | -0.07                                 | -0.56                                 | -0.48                                 | 0.01                                  | -0.02                                  | -0.02                                  | -0.14                                  | 0.02                                   | -0.06                                  | -0.28                                  | 24.3                                    | 13.6    |         |      |  |
| IT     | 0.11        | 0.19                                  | 0.24                                  | 0.23                                  | -0.02                                 | 0.08                                   | -0.1                                   | 0.07                                   | -0.01                                  | -0.03                                  |                                        |                                         |         |         | 0.57  | 2.29                                  | 1.03                                  | 0.66                                  | 0.71                                  | 0.08                                   | 0.04                                   | 0.4                                    | 0.35                                   | 0.23                                   | 1.59                                   | 263.3                                   |         |         |      |  |
| Pt-2   | Con1        | -0.06                                 | 0.07                                  | -0.1                                  | 0.19                                  | -0.01                                  | 0                                      | 0.07                                   | -0.05                                  | 0.05                                   | -0.08                                  |                                         | 49.0    | 5.9     |       | 0.2                                   | -0.02                                 | 0.02                                  | -0.14                                 | -0.03                                  | -0.02                                  | 0.04                                   | -0.01                                  | 0.04                                   | 0.02                                   | 0                                       | 63.7    | 48.6    |      |  |
|        | Con2        | 0.44                                  | 0.13                                  | 0.17                                  | 0.06                                  | 0.02                                   | 0.03                                   | -0.06                                  | 0.07                                   | 0.25                                   | 0.21                                   |                                         | -1.0    | 7.1     |       | 0.21                                  | -0.02                                 | -0.02                                 | 0.12                                  | 0                                      | -0.02                                  | 0                                      | 0.07                                   | 0.08                                   | 0.01                                   | 0.02                                    | 24.3    | 20.9    |      |  |
|        | Con132      | 0.16                                  | 0.5                                   | 0.09                                  | 0.04                                  | -0.01                                  | 0.06                                   | -0.11                                  | -0.02                                  | 0.14                                   | 0.08                                   |                                         | 2.0     | 4.6     |       | 0.41                                  | 0                                     | 0.05                                  | 0.13                                  | -0.03                                  | -0.01                                  | 0.06                                   | 0.06                                   | 0.14                                   | 0.14                                   | -0.03                                   | 11.3    | 16.0    |      |  |
|        | Con267      | 0.27                                  | 0.21                                  | 0.1                                   | 0.15                                  | 0.05                                   | 0.06                                   | 0                                      | -0.02                                  | -0.06                                  | 0.05                                   |                                         | 1.3     | 2.2     |       | 0.14                                  | 0                                     | 0                                     | 0                                     | -0.03                                  | -0.05                                  | 0.06                                   | 0.03                                   | 0.08                                   | 0.03                                   | 0.03                                    | 1.0     | 29.3    |      |  |
|        | Con268      | 0                                     | -0.07                                 | 0.02                                  | 0.07                                  | -0.01                                  | 0                                      | -0.09                                  | 0.02                                   | 0.1                                    | -0.23                                  |                                         | 2.0     | 0.4     |       | 0.23                                  | 0.01                                  | 0.14                                  | 0.03                                  | -0.03                                  | -0.02                                  | 0.15                                   | 0.02                                   | 0.23                                   | 0.02                                   | 0.05                                    | 11.0    | 24.6    |      |  |
|        | Con385      | 0.3                                   | 0.34                                  | 0.13                                  | 0.37                                  | -0.01                                  | 0                                      | -0.12                                  | 0.08                                   | 0.13                                   | -0.03                                  |                                         | 7.7     | 7.8     |       | 0.59                                  | 0.1                                   | 0.19                                  | 0.99                                  | 0.01                                   | -0.01                                  | 0.1                                    | 0.36                                   | 0.07                                   | 0.03                                   | 0.11                                    | 3.0     | 8.0     |      |  |
|        | Con416      | 0.33                                  | 0.26                                  | -0.04                                 | 0.07                                  | 0.02                                   | 0.03                                   | 0.3                                    | 0.08                                   | 0.1                                    | 0.07                                   |                                         | 6.7     | 1.8     |       | 0.16                                  | -0.02                                 | 0.04                                  | 0.43                                  | -0.01                                  | 0.03                                   | 0.02                                   | 0.09                                   | 0.12                                   | 0.03                                   | 0.07                                    | 6.3     | 8.6     |      |  |
|        | Con514      | 0.06                                  | 0.22                                  | 0.12                                  | 0.3                                   | -0.01                                  | 0.04                                   | -0.1                                   | 0.1                                    | 0.48                                   | 0.49                                   |                                         | 0.3     | 3.9     |       | 0.23                                  | 0.01                                  | 0                                     | 0.23                                  | 0                                      | 0                                      | 0.09                                   | 0.1                                    | 0.26                                   | 0                                      | 0                                       | 20.0    | 1.7     |      |  |
| Con690 | 0.06        | 0.05                                  | -0.14                                 | -0.07                                 | -0.01                                 | 0                                      | -0.14                                  | 0.05                                   | 0.3                                    | -0.02                                  |                                        | 107.7                                   | 8.8     |         | 0.22  | 0.02                                  | 0.08                                  | 0.22                                  | 0.06                                  | 0                                      | 0.11                                   | 0.09                                   | 0.23                                   | 0.01                                   | 0                                      | 31.3                                    | 49.1    |         |      |  |
| IT     | 3.03        | 5.25                                  | 3.51                                  | 2.95                                  | 1.99                                  | 0.18                                   | 0.22                                   | 1.39                                   | 1.02                                   | 1.32                                   |                                        |                                         |         |         | 0.42  | 6.35                                  | 4.93                                  | 2.63                                  | 2.02                                  | 0.79                                   | 0.19                                   | 0.95                                   | 1.3                                    | 0.4                                    | 0.93                                   | 76.8                                    |         |         |      |  |
| Pt-3   | Con1        | 0.19                                  | 0                                     | 0.06                                  | 0.11                                  | 0                                      | 0.03                                   | 0.04                                   | 0.21                                   | 0                                      | 0.05                                   | -0.12                                   | 39.7    | 36.4    |       | 0.06                                  | -0.08                                 | 0.01                                  | -0.51                                 | -0.03                                  | 0                                      | 0.01                                   | -0.04                                  | -0.01                                  | 0                                      | 0.02                                    | 22.7    | 18.5    |      |  |
|        | Con2        | 0.22                                  | 0.12                                  | 0.06                                  | 0.07                                  | 0.13                                   | 0.19                                   | 0.08                                   | 0.03                                   | 0                                      | -0.02                                  | 0.12                                    | 87.7    | 28.9    |       | 0.04                                  | -0.16                                 | -0.25                                 | -0.73                                 | -0.01                                  | 0                                      | 0.01                                   | -0.058                                 | 0.03                                   | 0.06                                   | 0.01                                    | 0.02    | 7.3     | 15.8 |  |
|        | Con132      | 0.13                                  | 0.06                                  | 0.1                                   | 0.16                                  | 0.08                                   | 0.06                                   | 0.07                                   | 0.08                                   | 0.04                                   | 0.04                                   | 0.16                                    | 33.7    | 24.2    |       | 0.09                                  | -0.11                                 | -0.09                                 | -0.32                                 | 0.02                                   | 0.03                                   | 0.01                                   | 0.04                                   | 0.04                                   | 0.03                                   | 0.11                                    | 11.7    | 19.8    |      |  |
|        | Con267      | 0.23                                  | 0.01                                  | 0.09                                  | 0.15                                  | 0.09                                   | 0.07                                   | 0.03                                   | 0.41                                   | 0.05                                   | 0.07                                   | 0.02                                    | 54.3    | 19.1    |       | 0.19                                  | -0.05                                 | -0.16                                 | -0.66                                 | -0.02                                  | -0.02                                  | 0                                      | 0.07                                   | 0.06                                   | 0.03                                   | 0.03                                    | 2.0     | 16.1    |      |  |
|        | Con268      | 0.24                                  | 0.08                                  | 0.09                                  | 0.21                                  | 0.11                                   | 0.16                                   | 0.08                                   | 0.28                                   | 0.04                                   | 0.09                                   | 0.18                                    | 54.7    | 14.7    |       | 0.14                                  | -0.03                                 | -0.07                                 | -0.31                                 | 0.02                                   | -0.01                                  | 0.05                                   | 0.04                                   | 0.01                                   | 0.05                                   | 0.23                                    | 0.7     | 15.2    |      |  |
|        | Con385      | 0.06                                  | 0.18                                  | 0.03                                  | 0.02                                  | 0.05                                   | 0.14                                   | 0.11                                   | 0.04                                   | 0                                      | 0.04                                   | 0.18                                    | 37.7    | 14.0    |       | 0.35                                  | 0.11                                  | 0.12                                  | 0.18                                  | 0.08                                   | 0.05                                   | -0.01                                  | 0.05                                   | -0.03                                  | 0.03                                   | 1.3                                     | 1.5     |         |      |  |
|        | Con416      | 0.13                                  | 0.01                                  | 0.06                                  | 0.03                                  | 0                                      | 0.13                                   | 0.05                                   | 0.02                                   | 0                                      | 0                                      | 0.19                                    | -9.3    | 21.4    |       | 0.2                                   | 0.15                                  | 0.3                                   | 0.69                                  | 0                                      | 0.04                                   | 0.01                                   | 0.08                                   | 0.05                                   | -0.04                                  | 0.1                                     | 2.7     | 9.2     |      |  |
|        | Con514      | 0.47                                  | 0.12                                  | 0.14                                  | 0.14                                  | 0.35                                   | 0.18                                   | 0.23                                   | 0.36                                   | 0.06                                   | 0.2                                    | 0.32                                    | 17.3    |         |       | 0.29                                  | -0.01                                 | 0.43                                  | 0.06                                  | 0                                      | 0.04                                   | 0.02                                   | 0.09                                   | 0.08                                   | 0.06                                   | 0.14                                    | 21.7    | 8.9     |      |  |
| Con690 | 0.13        | 0.04                                  | -0.01                                 | 0.07                                  | 0.11                                  | 0.02                                   | 0.07                                   | 0.06                                   | -0.04                                  | 0.03                                   | 0.09                                   | 3.7                                     | 28.1    |         | 0.15  | -0.05                                 | -0.14                                 | -0.27                                 | 0.02                                  | 0.03                                   | 0.01                                   | 0.07                                   | 0.12                                   | 0.06                                   | 0.01                                   | 21.7                                    | 12.2    |         |      |  |
| IT     | 0.3         | 0.26                                  | 0.19                                  | 0.09                                  | 0.17                                  | 0.19                                   | 0.11                                   | 0.05                                   | 0                                      | 0.04                                   | 0.25                                   | 191.3                                   |         |         | 0.78  | 0.67                                  | 1.59                                  | 1.51                                  | 0.26                                  | 0.11                                   | 0.07                                   | 0.46                                   | 0.07                                   | 0.1                                    | 0.37                                   | 105.0                                   |         |         |      |  |
| Pt-6   | Con1        | -0.45                                 | -0.08                                 | -0.1                                  | -0.03                                 | 0.1                                    | 0.1                                    | 0.02                                   | -0.03                                  | 0.01                                   | -0.01                                  | -0.25                                   | 4.4     | 2.9     |       | -0.04                                 | -0.06                                 | 0.36                                  | 0                                     | -0.07                                  | -0.01                                  | -0.03                                  | -0.12                                  | -0.08                                  | -0.23                                  | 0.08                                    | 46.0    | 29.8    |      |  |
|        | Con2        | -0.21                                 | -0.13                                 | -0.12                                 | -0.03                                 | 0.04                                   | 0.04                                   | -0.15                                  | -0.03                                  | -0.03                                  | 0.03                                   | -0.3                                    | 5.7     | 18.0    |       | -0.47                                 | 0.02                                  | -0.5                                  | -0.55                                 | -0.05                                  | 0.07                                   | -0.03                                  | -0.36                                  | -0.14                                  | -0.2                                   | 0.02                                    | 69.7    | 25.8    |      |  |
|        | Con132      | -0.13                                 | -0.12                                 | -0.17                                 | -0.02                                 | 0.02                                   | 0.03                                   | -0.02                                  | -0.02                                  | -0.03                                  | -0.01                                  | -0.27                                   | 4.4     | 18.5    |       | -0.05                                 | 0.04                                  | 0.19                                  | -0.14                                 | 0.05                                   | 0.01                                   | -0.02                                  | -0.1                                   | -0.14                                  | -0.17                                  | 0.15                                    | 55.3    | 17.9    |      |  |
|        | Con267      | -0.27                                 | -0.17                                 | -0.18                                 | 0.02                                  | 0.06                                   | 0.02                                   | -0.24                                  | -0.03                                  | -0.03                                  | -0.01                                  | 0.06                                    | 4.4     | 22.1    |       | 0.03                                  | 0                                     | -0.06                                 | -0.12                                 | 0.06                                   | 0.07                                   | 0.04                                   | -0.13                                  | -0.12                                  | -0.13                                  | 0.04                                    | 49.3    | 38.7    |      |  |
|        | Con268      | -0.16                                 | -0.07                                 | -0.05                                 | 0.15                                  | 0.26                                   | 0.09                                   | -0.11                                  | -0.01                                  | -0.03                                  | 0.02                                   | -0.12                                   | 77.0    | 13.4    |       | -0.07                                 | -0.12                                 | -0.44                                 | -0.46                                 | -0.11                                  | 0                                      | -0.05                                  | -0.33                                  | -0.09                                  | -0.28                                  | -0.04                                   | 24.0    | 12.1    |      |  |
|        | Con385      | -0.37                                 | -0.09                                 | -0.1                                  | -0.03                                 | 0.05                                   | 0.06                                   | 0.05                                   | -0.07                                  | 0.01                                   | 0.03                                   | -0.11                                   | 23.7    | 13.2    |       | -0.58                                 | -0.05                                 | -0.38                                 | -0.5                                  | -0.09                                  | 0.01                                   | -0.03                                  | -0.23                                  | -0.07                                  | -0.14                                  | -0.1                                    | 34.7    | 5.5     |      |  |
|        | Con416      | -0.35                                 | 0.06                                  | -0.18                                 | 0.02                                  | 0.06                                   | 0.02                                   | -0.28                                  | -0.02                                  | 0.02                                   | 0.04                                   | -0.19                                   | 59.4    | 12.3    |       | -0.73                                 | -0.06                                 | -0.57                                 | -0.63                                 | -0.09                                  | -0.02                                  | -0.04                                  | -0.4                                   | -0.14                                  | -0.27                                  | -0.01                                   | 29.7    | 4.2     |      |  |
|        | Con514      | -0.47                                 | -0.09                                 | -0.19                                 | 0.01                                  | 0.02                                   | -0.02                                  | -0.18                                  | -0.07                                  | -0.03                                  | -0.01                                  | -0.2                                    | 117.7   | 9.9     |       | 0.92                                  | 1.81                                  | 1.35                                  | 0.66                                  | 0.7                                    | 0.2                                    | -0.01                                  | 0.58                                   | 0.13                                   | 0.15                                   | 0.38                                    | 14.3    | 17.4    |      |  |
| Con690 | -0.44       | -0.17                                 | -0.22                                 | -0.02                                 | 0.16                                  | 0.31                                   | -0.18                                  | -0.02                                  | 0.02                                   | -0.01                                  | -0.16                                  | 3.7                                     | 27.8    |         | -0.13 | -0.04                                 | -0.02                                 | -0.16                                 | -0.07                                 | 0.03                                   | -0.06                                  | -0.13                                  | -0.08                                  | -0.12                                  | -0.01                                  | 35.0                                    | 19.8    |         |      |  |
| IT     | 2.1         | 1.71                                  | 1.48                                  | 0.95                                  | 1.26                                  | 0.36                                   | 0.22                                   | 0.58                                   | 0.23                                   | 0.06                                   | 0.14                                   | 424.4                                   |         |         | -0.46 | -0.06                                 | -0.38                                 | -0.32                                 | -0.06                                 | -0.02                                  | 0.04                                   | -0.12                                  | -0.07                                  | -0.14                                  | -0.11                                  | 87.3                                    |         |         |      |  |
| Pt-12  | Con1        | 0.05                                  | -0.12                                 | -0.02                                 | -0.35                                 | 0.01                                   | -0.05                                  | 0                                      | 0                                      | -0.13                                  | -0.02                                  | -0.06                                   | 38.7    | 37.9    |       | -0.01                                 | 0.03                                  | -0.01                                 | 0.02                                  | 0.08                                   | 0.21                                   | 0.15                                   | 0.04                                   | -0.02                                  | -0.02                                  | -0.02                                   | 75.7    | 21.1    |      |  |
|        | Con2        | -0.08                                 | 0.09                                  | -0.44                                 | -1.09                                 | -0.04                                  | -0.37                                  | -0.05                                  | -0.3                                   | -0.1                                   | 0.1                                    | -0.05                                   | 6.4     | 23.0    |       | -0.01                                 | 0.03                                  | -0.01                                 | 0.03                                  | 0.02                                   | 0.1                                    | 0.15                                   | -0.03                                  | 0.01                                   | -0.01                                  | -0.04                                   | 16.0    | 24.1    |      |  |
|        | Con132      | 0.1                                   | 0.07                                  | -0.24                                 | -0.93                                 | 0.03                                   | -0.03                                  | -0.05                                  | -0.21                                  | -0.25                                  | 0                                      | -0.03                                   | 55.7    | 21.8    |       | 0                                     | 0.01                                  | -0.02                                 | 0                                     | 0.05                                   | -0.01                                  | 0.06                                   | 0                                      | 0                                      | -0.03                                  | 0.01                                    | 25.3    | 26.7    |      |  |
|        | Con267      | -0.03                                 | -0.03                                 | -0.33                                 | -1.03                                 | -0.05                                  | -0.05                                  | 0                                      | -0.2                                   | -0.22                                  | -0.06                                  | -0.02                                   | 38.4    | 31.1    |       | -0.01                                 | 0                                     | -0.01                                 | -0.01                                 | 0.02                                   | 0.02                                   | 0                                      | -0.07                                  | -0.02                                  | -0.01                                  | -0.04                                   | 34.0.   |         |      |  |
